# Supplementary material for: Mutation analysis links angioimmunoblastic T-cell lymphoma to clonal hematopoiesis and smoking
Source: eLife journal article supplement (doi:10.7554/elife.66395), 2021-09-27
Supplement: supp [file elife-66395-supp-v1.zip]

Archive with 14 entries (14 files):
- elife_poa_e66395_Figure_1_figure_supplement_1.pdf
- elife_poa_e66395_Figure_1_figure_supplement_2.pdf
- elife_poa_e66395_Figure_1_figure_supplement_3.pdf
- elife_poa_e66395_Figure_1_figure_supplement_4.pdf
- elife_poa_e66395_Figure_2_figure_supplement_1.pdf
- elife_poa_e66395_Figure_2_figure_supplement_2.pdf
- elife_poa_e66395_Figure_2_figure_supplement_3.pdf
- elife_poa_e66395_Figure_2_figure_supplement_4.pdf
- elife_poa_e66395_Figure_2_figure_supplement_5.pdf
- elife_poa_e66395_Supplementary_file_1.xlsx
- elife_poa_e66395_Supplementary_file_2.xlsx
- elife_poa_e66395_Supplementary_file_3.xlsx
- elife_poa_e66395_Supplementary_file_4.xlsx
- elife_poa_e66395_Transparent_Reporting_File.docx
