# Supplementary material for: Mutation analysis links angioimmunoblastic T-cell lymphoma to clonal hematopoiesis and smoking
Source: eLife journal article supplement (doi:10.7554/elife.66395), 2021-09-27
Supplement: supp [file elife-66395-supp-v1.zip › elife_poa_e66395_Figure_1_figure_supplement_3.pdf]

A

### Overall genomic alterations (paired BM/PB, n =25)

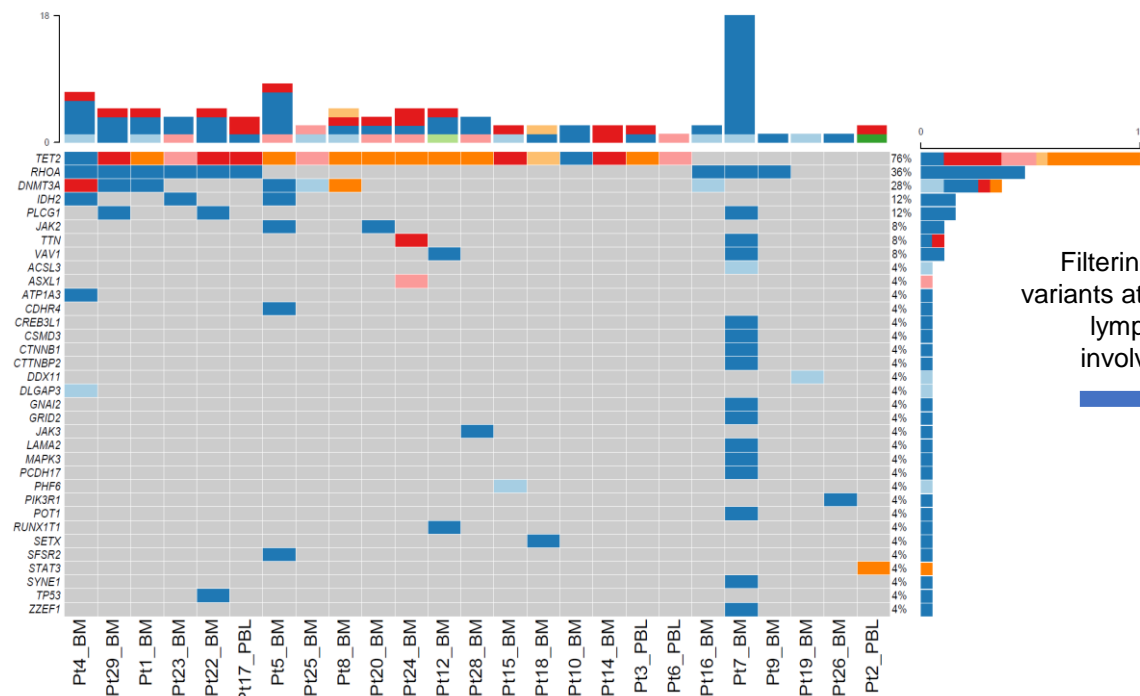

Filtering out the  
variants attributable to  
lymphoma  
involvement

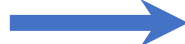

B

### CH-associated genomic alterations (Paired BM/PB, n =19)

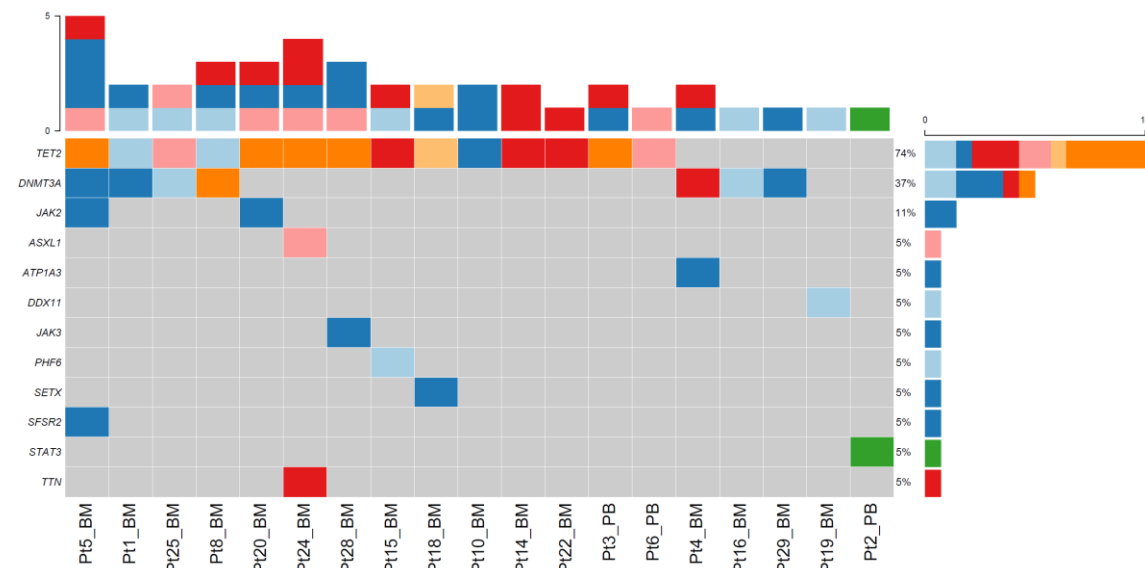

- Frame\_Shift\_Deletion
- Missense\_Mutation
- Nonsense\_Mutation
- In\_Frame\_Insertion
- Frame\_Shift\_Insertion
- Splice\_Site
- In\_Frame\_Deletion
- Multi\_Hit
