# Supplementary material for: Mutation analysis links angioimmunoblastic T-cell lymphoma to clonal hematopoiesis and smoking
Source: eLife journal article supplement (doi:10.7554/elife.66395), 2021-09-27
Supplement: supp [file elife-66395-supp-v1.zip › elife_poa_e66395_Supplementary_file_1.xlsx]

## Sheet: Sheet1
	Supplementary file 1 Clinico-pathologic information of patients
	Patient Number	T	Sex	Age	Dx	Lymph node sampling date	clinical status of lymph node specimen	BM/PB sampling date	Clinical or treatment status of BM/PB specimen	LN and BM/PB sampling interval (days)&	Pathology of BM/PB	Concurrent hematologic Malignancy	Morphology	MFC	TCRG Rearrangement	TB	CH	Documented smoking history	CHN-free latent duration (until date of death or last follow-up, days)
	#1	PB	F	50-59	Lung cancer, AITL	2017-05-11	Dx	2017-05-12	Dx	1	megakaryocytes slightly increased in number without significant cytologic atypia. PB, Normocytic anemia. Leukocytosis with neutrophilia	No	-	0	n/a	0.5-1%	+	NO	240
	#2	PB	M	30-39	PTCL, NOS	2017-03-03	Dx	2017-01-27	pre-Dx	-35	BM, hypocellular bone marrow with relative eosinophilia, PB, eosinophilia	No	-	0.015	PCR+	0.015	+	NO	600
	#3	PB	M	50-59	AITL	2017-03-10	Dx	2017-03-13	Dx	3	unremarkable	No	-	0	PCR-	0	+	YES	510
	#4	BM	F	60-69	AITL	2019-01-17	Dx	2019-01-18	Dx	1	involvement, megakaryocytes are focally clustered and some have atypical nuclear lobation, PB, unremarkable	No	+	0.021	PCR+	0.021	+	NO	870
	#5	BM	F	60-69	AITL, CMML	2018-05-15	Post-Romidepsin/Revlimid treatment	2018-04-30	Post-Romidepsin/Revlimid treatment	-15	granulopoiesis, dysgranulopoiesis, decreased erythropoiesis, monocytosis, unremarkable T cells. PB, Absolute monocytosis.	CMML, 10 months post-AITL Dx	-	0	PCR+	1-5%$	+	NO	360
	#6	PB	M	70-79	AITL	2017-07-21	Dx	2017-07-07	2 weeks pre-Dx	-14	Megakaryocytes were dysplastic (>10%). Including small / giant forms with hypo / hyperlobulated nuclei. Myelopoiesis is hyperplastic and slightly left-shifted. Mild dysgranulopoiesis is present (<10%) with giant forms and abnormal segmentation.	No	-	0	n/a	0	+	NO	1020
	#7	BM	M	70-79	AITL	2016-04-27	Dx	2017-10-06	about 14 months post-chemotherapy	527	involvement	No	+	0.04	n/a	0.04	-	NO	540
	#8	BM	M	70-79	Prostate cancer, PTCL-TFH	2015-12-04	Dx	2015-11-13	3 weeks pre-Dx	-21	involvement	No	+	0.001	n/a	0.001	+	YES	180
	#9	BM	F	50-59	AITL	2016-11-16	Dx	2017-03-13	chemotherapy for two and a half months	117	unremarkable	No	-	0	PCR+	1-5%$	-	NO	1620
	#10	BM	M	60-69	AITL	2018-05-30	Dx	2018-11-05	chemotherapy for 5 months	159	unremarkable	No	-	0	PCR-	0	+	NO	1080
	#11	BM	F	70-79	AITL	2016-04-04	Dx	2016-03-29	pre-Dx	-6	ITP	No	-	0	PCR-	0	-	YES	2220
	#12	PB	M	70-79	AITL	2018-06-28	Dx	2018-10-10	chemotherapy for 3 months, no additional treatment	104	unremarkable	No	-	0	PCR+	1-5%	-	NO	180
	#14	BM	M	70-79	PTCL-TFH, DLBCL	2010-11-30	Dx	2010-12-15	2 weeks post-Dx	15	ITP	DLBCL, 7 years post-AITL Dx	-	0	PCR-	0	+	NO	2982
	#15	BM	M	70-79	AITL	2016-03-11	Dx	2016-03-07	pre-Dx	-4	unremarkable	No	-	0	PCR+	1-5%$	+	NO	30
	#16	BM	F	80-89	AITL	2019-10-28	Dx	2019-10-24	pre-Dx	-4	involvement	No	+	0.1	PCR+	0.1	+	n/a	30
	#17	PB	M	80-89	AITL	2019-03-01	Dx	2019-03-14	2 weeks post-Dx	13		No	-	0.004	PCR+	0.004	-	YES	810
	#18	BM	M	60-69	PTCL, NOS	2011-12-09	Dx	2011-12-20	1-2 weeks post-Dx	11	Mildly hypercellular marrow with mild granulocytic hyperplasia	No	-	0	PCR-	0	+	NO	75
	#19	BM	F	50-59	AITL	2016-03-31	Relapse	2015-01-23	pre-Dx	-433	unremarkable	No	-	0	PCR+	1-5%$	+	YES	630
	#20	BM	M	40-49	Lung Cancer, post-PV MF, PTCL-TFH	2019-09-12	Dx	2019-09-04	pre-Dx	-8	post-PV myelofibrosis	PV, post-PV myelofibrosis prior to AITL Dx	-	0	PCR-	0	+	NO	135
	#21	BM	F	40-49	AITL	2010-04-23	Dx	2010-04-20	pre-Dx	-3	unremarkable	No	-	0	PCR-	0	-	NO	600
	#22	BM	F	60-69	AITL	2016-04-22	Dx	2016-04-06	pre-Dx	-16	a mildly hypercellular bone marrow with myeloid hyperplasia	No	-	0	PCR-	~1%	+	NO	390
	#23	BM	M	60-69	DLBCL and AITL	2019-08-01	Dx	2019-07-30	pre-Dx	-2	unremarkable	DLBCL	+	0.1	PCR+	0.1	-	NO	10
	#24	BM	M	30-39	AITL, PV	2018-06-06	Dx	2018-10-25	chemotherapy for 4 months	141	Myelopoiesis is hyperplastic and slightly left-shifted with ~4% blasts. Evidence of significant dysplasia is not seen	PV, 17 months post-AITL Dx	-	0	PCR-	0	+	YES	510
	#25	BM	M	70-79	AITL	2013-10-03	Dx	2014-09-18	7 months post-chemotherapy for AITL	350	Hypercellular bone marrow with myeloid hyperplasia	No	-	0	PCR-	0	+	NO	390
	#26	BM	M	60-69	PTCL-TFH	2015-05-15	Dx	2016-05-13	pre-Dx	364	involvement	No	+	0.021	PCR+	0.021	-	n/a	1560
	#27	no matched BM or PB	F	60-69	Lung cancer, PTCL, NOS	2010-01-02	Dx	n/a	n/a	n/a	n/a	n/a	n/a	n/a	n/a	n/a	n/a	YES	2190
	#28	BM	F	70-79	AITL	2011-03-02	Dx	2011-02-28	pre-Dx	-2	involvement	No	+	0.024	PCR+	0.024	+	NO	19
	#29	BM	M	50-59	CTCL to AITL	2018-09-10	Dx	2018-07-12	pre-Dx	-60	small population of abnormal myeloid blasts noted in BM, but no MPN diagnosized	No	-	0	PCR+	1-5%$	+	NO	540
