# Supplementary material for: Mutation analysis links angioimmunoblastic T-cell lymphoma to clonal hematopoiesis and smoking
Source: eLife journal article supplement (doi:10.7554/elife.66395), 2021-09-27
Supplement: supp [file elife-66395-supp-v1.zip › elife_poa_e66395_Supplementary_file_2.xlsx]

## Sheet: gene list
	List of genes covered by two targeted sequencing panels.
	T cell targeted NGS panel
	AASDH	BTBD11	COL4A2	EIF3A	HIST1H3J	LILRB1	NAV2	PEG3	RB1	SPAG17	TTC28
	ABCA7	C10orf120	COL5A2	ENAM	HLA-DPB1	LMF1	NAV3	PER1	RBBP8	SPATA31D1	TTN
	ABCC4	CACNA1C	COL6A3	ENO4	HMCN1	LMO2	NCKAP5	PHACTR1	RBFOX1	SPECC1	TUBGCP6
	ACSL3	CACNA1D	COL6A6	ENPP3	HOXA2	LOC283710	NCOA1	PHIP	RBMXL2	SPEG	TYK2
	ACSL6	CACNA1S	CPXM2	EP300	HOXA6	LOC554223	NCOA2	PIK3CB	RBP3	SPINK5	TYRP1
	ACVR1C	CACNA2D1	CRAMP1L	EPB41L3	HOXA9	LPHN3	NCOR1	PIK3CD	RECQL4	SPTA1	UBR5
	ADAM28	CALR	CREB3L1	EPC2	HUWE1	LRP1B	NCOR2	PIK3R1	RELN	SPTBN1	UGT3A1
	ADAM33	CARD11	CREBBP	EPHA5	IDH2	LRP6	NEDD4	PKD2L1	RFX4	SRGAP3	ULK4
	ADAMTS12	CARS	CRTAC1	EPHA6	IFNAR2	LRRC14B	NEFH	PKHD1	RFXAP	SRRM2	UNC79
	ADAMTS5	CASC5	CSMD1	ERBB4	IGSF22	LRRK1	NEIL3	PLCG1	RHOA	ST18	UNC80
	ADAMTS9	CASP3	CSMD2	ETV1	IL2RG	LSR	NF1	PLCG2	RLTPR	STAB1	USF2
	AFF3	CASP8AP2	CSMD3	ETV6	ING1	LTBP1	NFKB1	PLK2	RNF213	STARD9	USP51
	AKT1	CBFA2T3	CSNK1A1	EXT2	INO80	LYN	NFKB2	PLK3	ROBO4	STAT3	USP8
	ALDH1A2	CCDC91	CTCF	EZH2	INSR	MAGEC1	NIN	PLXNC1	ROM1	STAT5B	VAV1
	ALK	CCR4	CTNNA2	EZR	INTS8	MAGI1	NLRP12	PML	ROS1	STIL	VPS13A
	ALMS1	CCR8	CTNNB1	FAM22G	IPO9	MAML2	NLRP4	PMS1	RPS24	STK11IP	WDFY3
	ALPK2	CD28	CTNND1	FAM47A	IQCJ-SCHIP1	MAPK3	NLRP7	POF1B	RUNX1T1	STXBP3	WDFY4
	ALPK3	CD300C	CTTNBP2	FAM71C	IRS2	MDN1	NOP2	POLE	RXFP2	SYNE1	WDR17
	ALPP	CD300LB	CUL9	FAS	JAK1	MET	NOTCH1	POT1	RYR2	SYNPO2L	WDR60
	ANAPC2	CD53	CUX1	FAT1	JAK2	MGAT4C	NOTCH2NL	PPP1R9A	RYR3	TACC2	WIF1
	ANK3	CD58	CYYR1	FAT2	JAK3	MICAL3	NOTCH3	PRDM1	SACS	TAL1	WNT7B
	ANKLE1	CDH10	DDI1	FAT3	JPH3	MID1	NPAT	PREX2	SAMD9	TATDN2	XIRP2
	ANKRD50	CDH11	DDX11	FAT4	KAT6A	MLF1	NPHS1	PRKCDBP	SCAF1	TBC1D8B	XRCC6BP1
	ANO3	CDH16	DDX3X	FBN1	KAT6B	MLH1	NR5A2	PRKCQ	SCN1A	TCF12	ZAP70
	APC	CDH18	DENND2A	FBN3	KCNH8	MLL	NRAS	PRKD2	SCN2A	TCF20	ZEB1
	ARFGEF1	CDH19	DHX15	FBXO11	KCNK1	MLL2	NRG1	PRKG1	SDK2	TCF7L2	ZFHX3
	ARHGEF11	CDHR4	DLC1	FBXW7	KCNN3	MLL3	NRG3	PROX1	SEMA3A	TENM1	ZIC4
	ARHGEF17	CDKN2A	DLGAP2	FEZF1	KCTD8	MOCOS	NT5C3	PRRC2C	SETBP1	TET1	ZNF226
	ARHGEF3	CDON	DLGAP3	FGFR1	KDM4C	MPRIP	NTRK1	PTCHD2	SETD2	TET2	ZNF292
	ARID1A	CHD4	DMBT1	FH	KDM6A	MSH6	NTRK3	PTCHD4	SETX	TET3	ZNF365
	ARID1B	CHD8	DMD	FLG	KDR	MTERFD3	NUMA1	PTEN	SFSWAP	THSD7A	ZNF462
	ARID2	CHEK2	DMKN	FLT3	KIAA0922	MTMR8	OSBPL6	PTK6	SGK1	TLR3	ZNF572
	ARNT2	CHL1	DMXL2	FN1	KIAA1324	MUC12	P2RY6	PTPN1	SH2B3	TLX1	ZNF579
	ARPP21	CHST6	DNAH2	FNBP1	KIF26A	MUC16	PAPLN	PTPN13	SH3BP4	TMEM51	ZNF608
	ATM	CHST7	DNAH5	FNBP4	KIF5B	MUC17	PAPPA2	PTPN23	SLC13A5	TMPRSS2	ZP4
	ATP1A3	CHSY3	DNAH6	FNDC1	KIF7	MUC2	PASD1	PTPRB	SLC16A14	TNFAIP3	ZSWIM4
	ATP2A2	CIITA	DNAH7	FOXA3	KIT	MUC5B	PASK	PTPRC	SLC17A6	TNFRSF14	ZZEF1
	ATXN3	CIZ1	DNM3	FOXO1	KLHL40	MUM1	PBRM1	PTPRD	SLC25A24	TNFRSF19
	B2M	CLEC14A	DNMT3A	FUBP3	KLK2	MX2	PCDH17	PTPRF	SLC3A2	TNFRSF1B
	BANK1	CLK2	DOCK3	FYN	KRAS	MYBPH	PCDHA11	PTPRM	SLC44A5	TNS1
	BCL9	CLTC	DOCK7	GABRE	KRTAP1-3	MYC	PCDHA12	PTPRN2	SLC6A2	TP53
	BCOR	CMYA5	DOCK9	GABRR1	KRTAP26-1	MYH11	PCDHGA11	PTPRT	SLC8A3	TPR
	BCORL1	CNOT4	DPY19L2	GNAI2	KTN1	MYH7	PCDHGA9	PTPRZ1	SLITRK3	TRAF5
	BCR	CNTN3	DSPP	GPAT2	LAMA1	MYH9	PCLO	PWWP2A	SMAD3	TRAF6
	BIRC6	CNTN4	DST	GPI	LAMA2	MYL2	PCMTD1	RAB9B	SMARCA2	TRIM3
	BMPER	CNTRL	DTHD1	GPR27	LAMC2	MYO18B	PCSK5	RAD21	SMARCAD1	TRMT12
	BRAF	COL11A1	DYNC2H1	GRID2	LAT	MYO3A	PDCD1	RALGAPB	SMARCB1	TRPA1
	BRCA2	COL12A1	E2F1	GRIK4	LCK	MYOD1	PDE4DIP	RARA	SMCHD1	TRPM6
	BRIP1	COL19A1	EBF1	GTF2I	LHCGR	MYT1L	PDGFRB	RASA2	SOCS1	TRRAP
	BRPF3	COL22A1	EBF2	HIST1H1B	LIFR	NAA11	PDPK1	RASAL2	SOWAHA	TSKU
	Myeloid targeted NGS panel
	ABL1	CALR	EZH2	IDH1	KDM6A	NOTCH1	RAD21	SMC1A	TET2
	ASXL1	CBL	FLT3	IDH2	KIT	NPM1	RUNX1	SMC3	TP53
	BCOR	CEBPA	GATA1	IKZF1	KRAS	NRAS	SETBP1	SRSF2	U2AF1
	BRAF	DNMT3A	GATA2	JAK1	MPL	PHF6	SF3B1	STAG2	WT1
	BRINP3	ETV6	HNRNPK	JAK2	NFE2	PTPN11	SH2B3	SUZ12	ZRSR2
	The genes colored in pink, are the overlapped ones between two panels

## Sheet: Sequencing summary
	Summary of genomic sequencing of BM/PB samples by T cell targeted panel and myeloid targeted panel
	Patient Number	Type of Specimen	Mutations	T cell Panel			Myeloid Panel
				Total reads	Alternative allele reads	VAF(%)	Total reads	Alternative allele reads	VAF(%)
	#1	PB	TET2 p.E1089fs	715	346	48.3916	5937	2374.8	40
			DNMT3A p.F701L	1291	447	34.6243	6628	2379.45	35.9
			TET2 p.Q743*	1408	6	0.43	3903	44	1.1
	#3	PB	TET2 p.P1367R	942	151	20.26	4855	898.175	18.5
			TET2 p.Y1337*	538	109	16.03	3949	967.505	24.5
	#8	BM	TET2 p.S315fs	1411	612	43.3735	3981	1823.3	45.8
			TET2 c.3594+1G>A	806	21	2.60546	4266	247.428	5.8
			DNMT3A p.Arg771Gln	1149	516	45	1988	1051.65	52.9
			DNMT3A p.Trp330*	1749	29	1.66	10316	237.268	2.3
	#10	BM	TET2 p.D1376G	1904	6	0.315126	3930	14	0.4
			TET2 p.N1484K	1396	548	38.26	9124	4625.87	50.7
	14#	BM	TET2 p.K454*	431	141	32.71	6155	2425.07	39.4
			TET2 p.K1799*	101	52	51.49	13470	5563.11	41.3
