# Supplementary material for: Mutation analysis links angioimmunoblastic T-cell lymphoma to clonal hematopoiesis and smoking
Source: eLife journal article supplement (doi:10.7554/elife.66395), 2021-09-27
Supplement: supp [file elife-66395-supp-v1.zip › elife_poa_e66395_Supplementary_file_4.xlsx]

## Sheet: AITL_BM_BP_summary
Supplemenatry file 4 Summary of variant types
		Primary AITL lymphoma				Paired BM/PB
		summary	Mean	Median	Percentage (%)	summary	Mean	Median	Percentage (%)
Variant Classification	Frame_Shift_Del	9	0.333	0	8.82353	6	0.316	0	13.6364
	Frame_Shift_Ins	7	0.259	0	6.86275	7	0.316	0	15.9091
	In_Frame_Del	1	0.037	0	0.980392	0	0	0	0
	In_Frame_Ins	1	0.037	0	0.980392	1	0.053	0	2.27273
	Missense_Mutation	62	2.296	1	60.7843	17	0.789	1	38.6364
	Nonsense_Mutation	20	0.741	1	19.6078	12	0.579	0	27.2727
	Splice_Site	2	0.074	0	1.96078	1	0.053	0	2.27273
Total		102	3.778	3	100	44	2.105	2	100
No. of Samples		27				27*
No. of Mutated genes		37				14
