# Supplementary figures and images for: Mutation analysis links angioimmunoblastic T-cell lymphoma to clonal hematopoiesis and smoking
Source: eLife journal article supplement (doi:10.7554/elife.66395), 2021-09-27

**A**

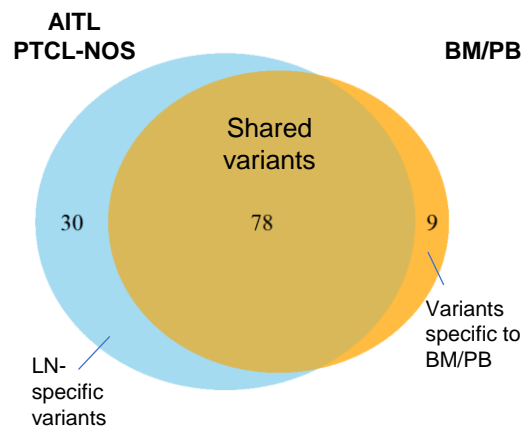

**B**

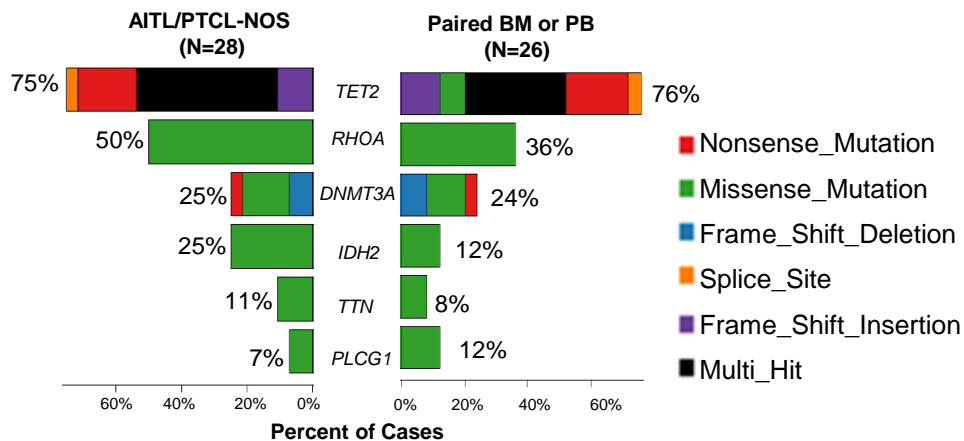

**C**

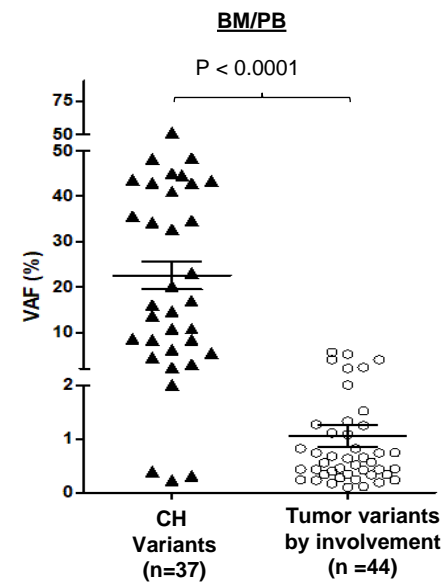

**D**

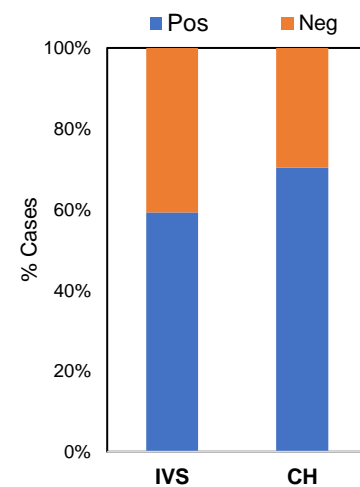

Supplement: supp [file elife-66395-supp-v1.zip › elife_poa_e66395_Figure_1_figure_supplement_1.pdf]

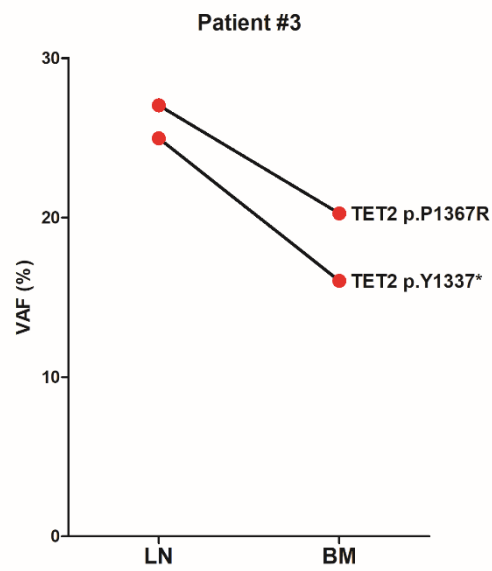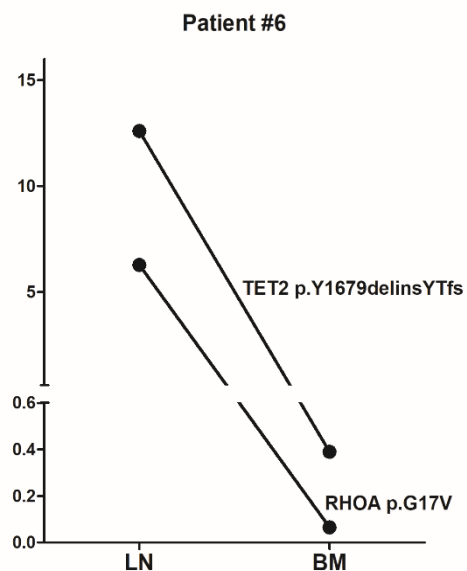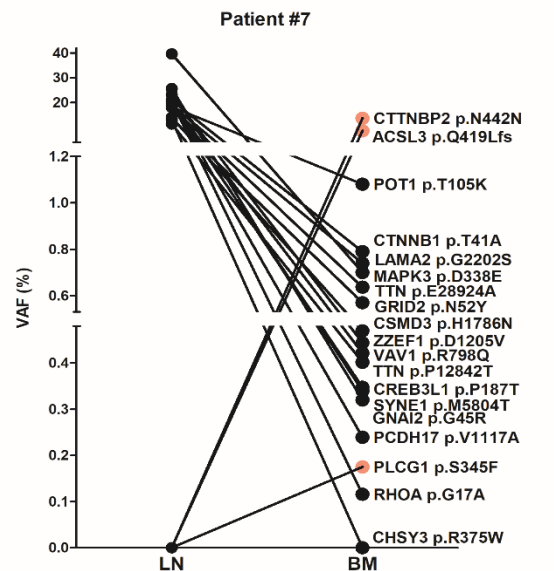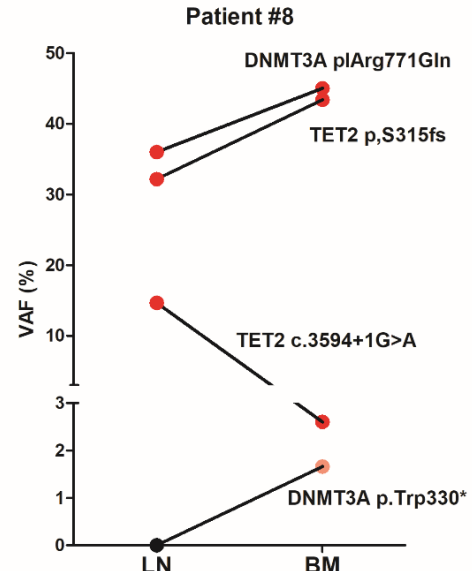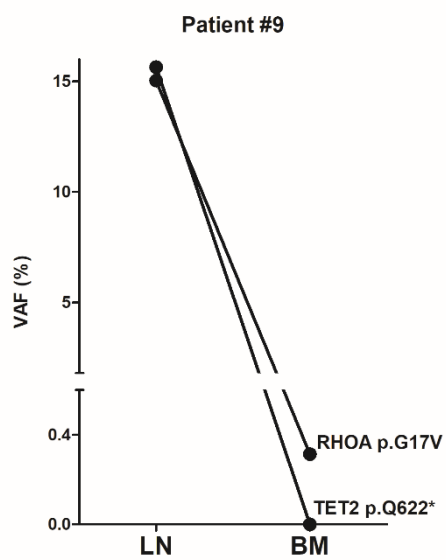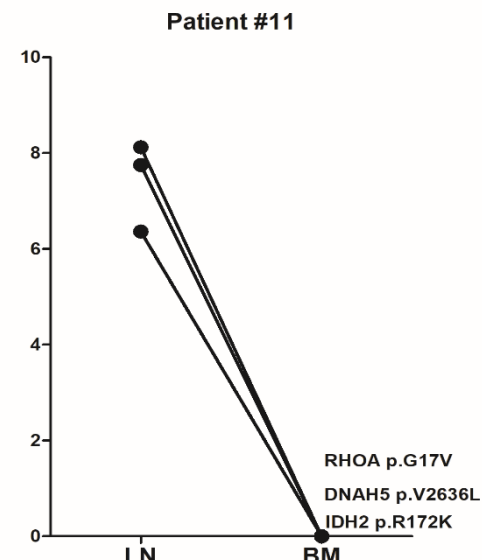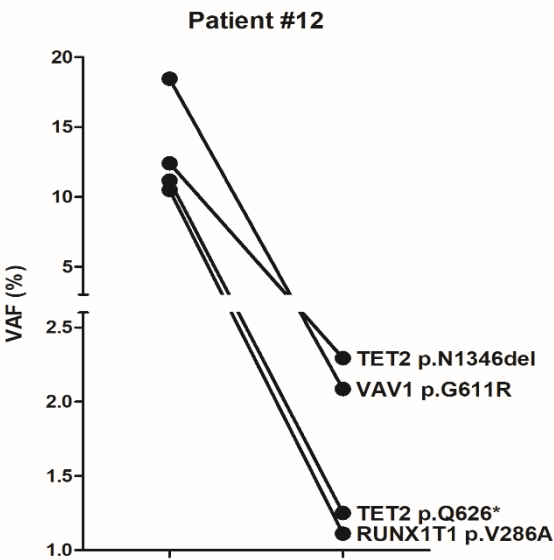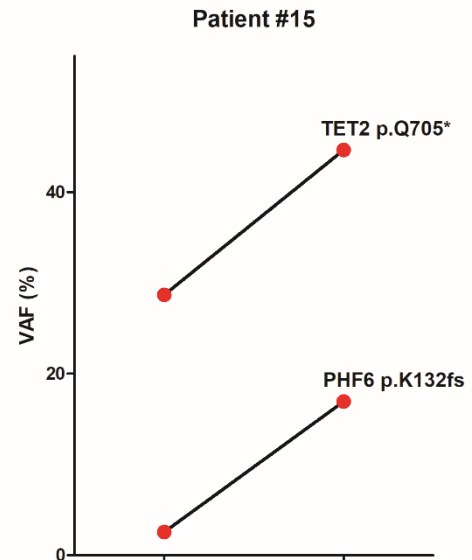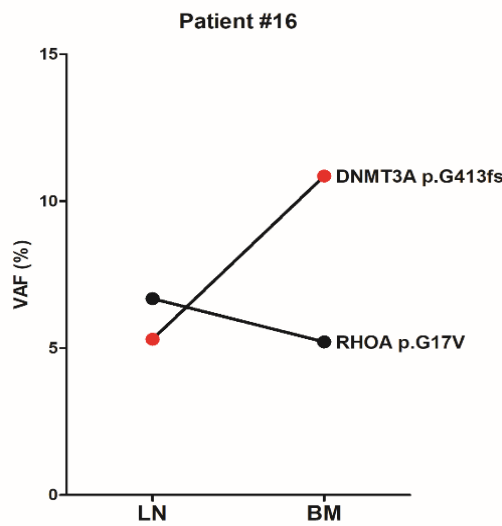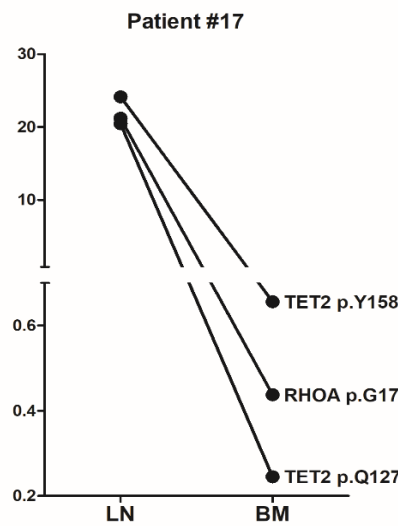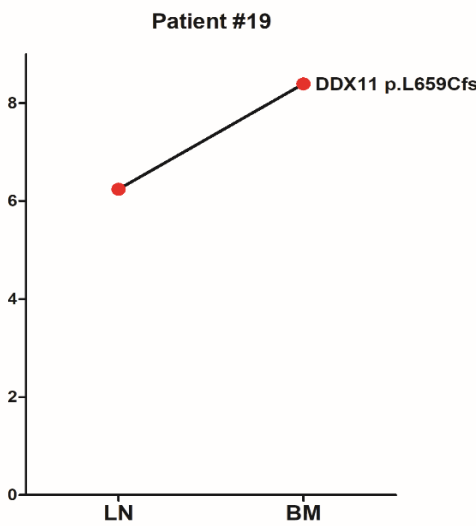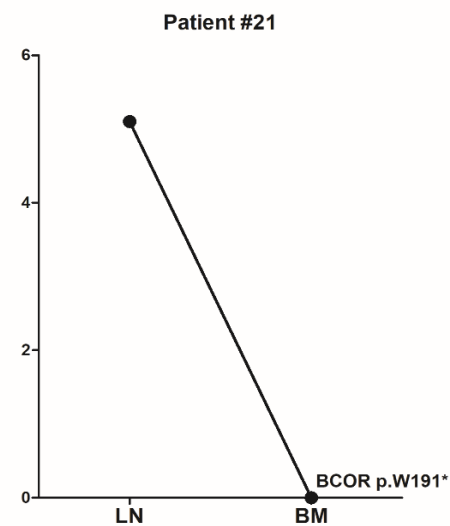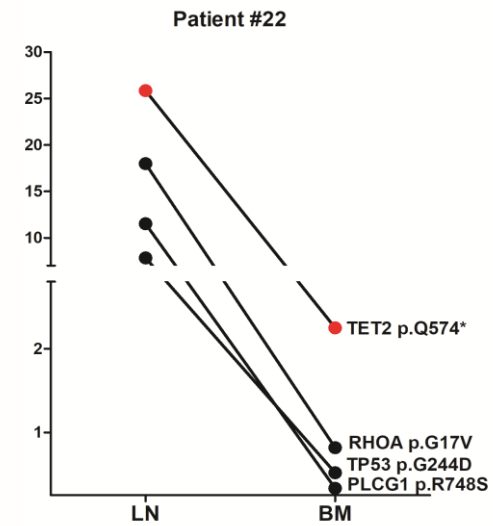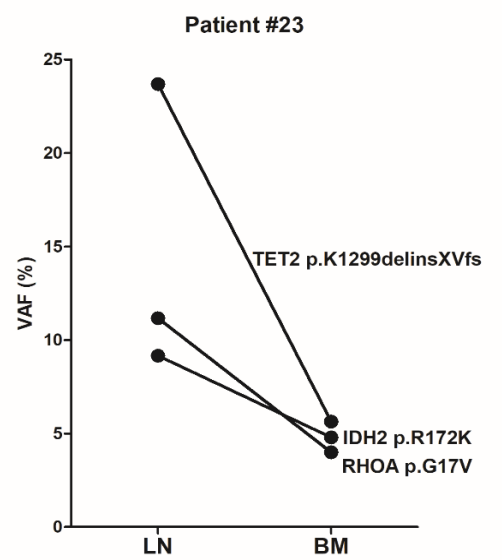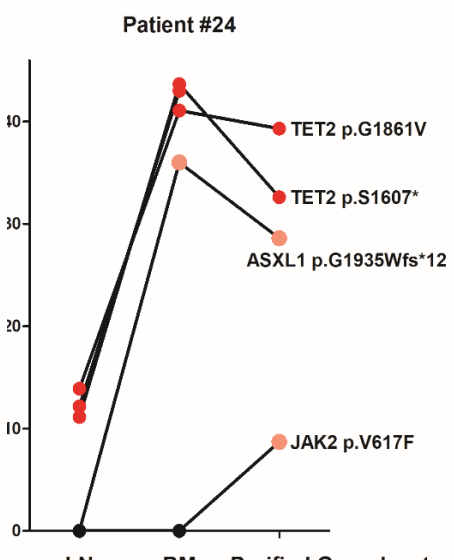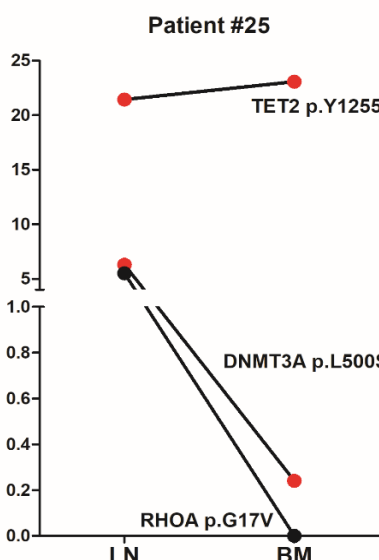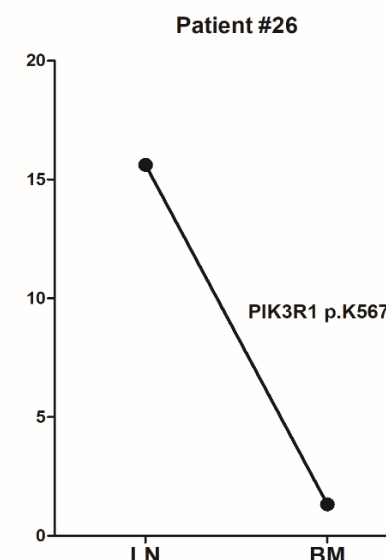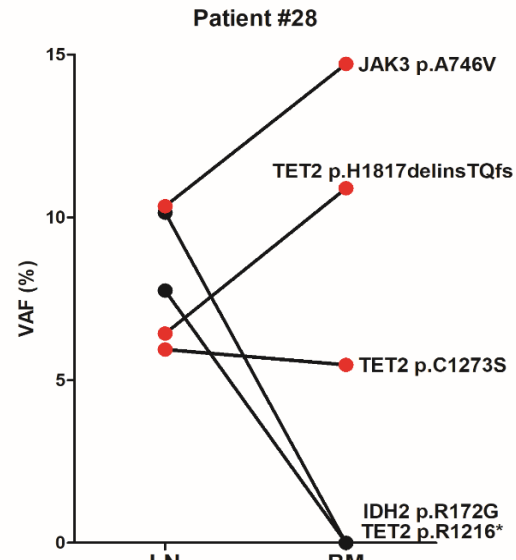

Supplement: supp [file elife-66395-supp-v1.zip › elife_poa_e66395_Figure_1_figure_supplement_2.pdf]

**A**

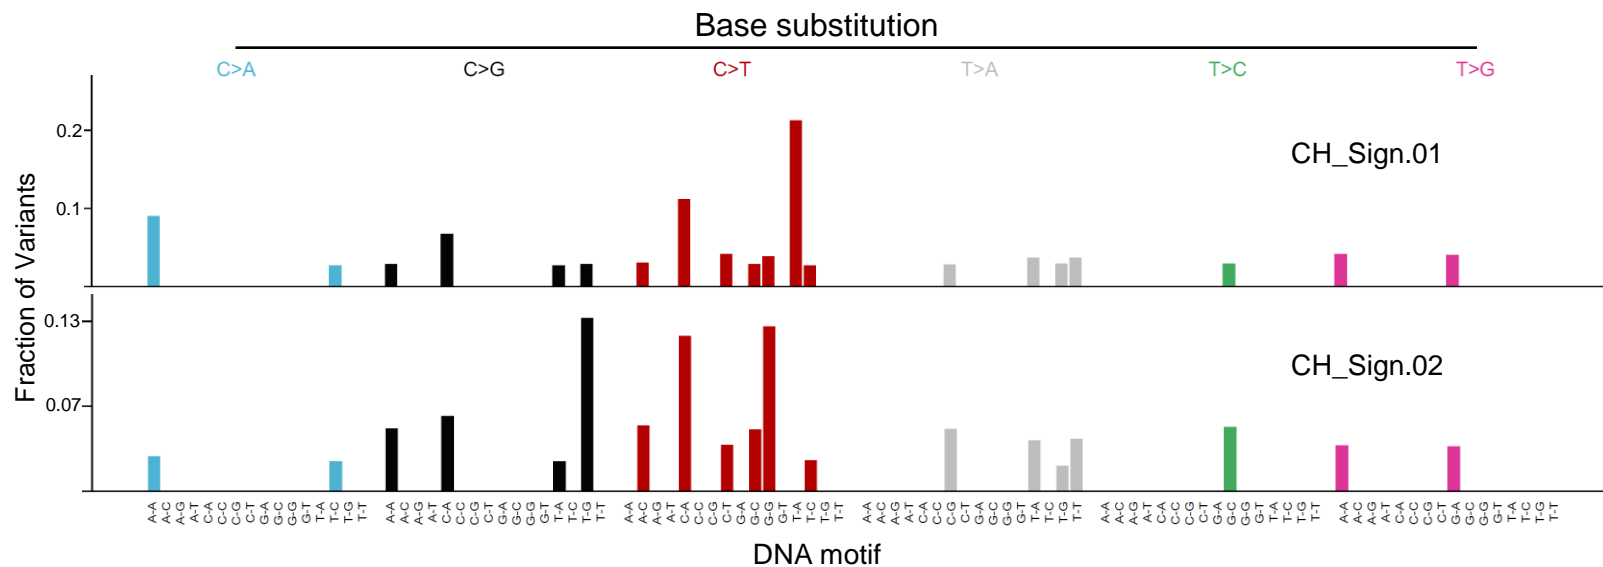

**B**

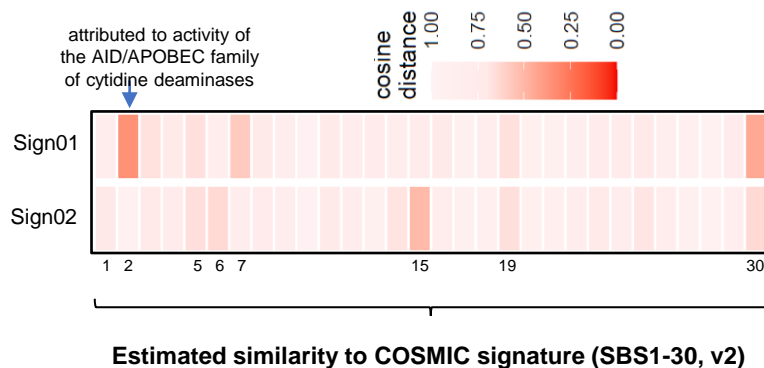

**C**

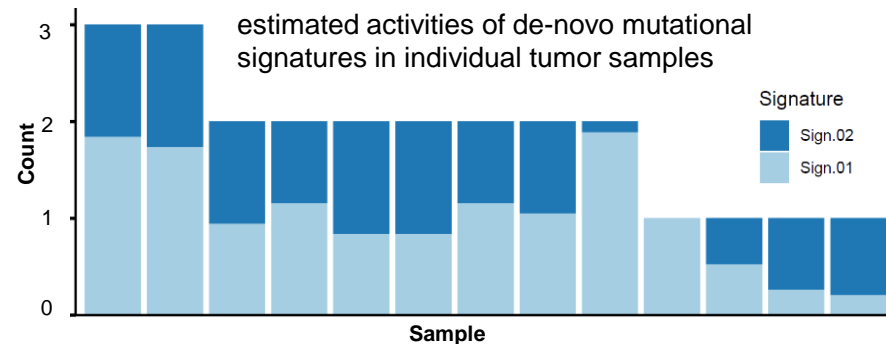

Supplement: supp [file elife-66395-supp-v1.zip › elife_poa_e66395_Figure_2_figure_supplement_1.pdf]

**A**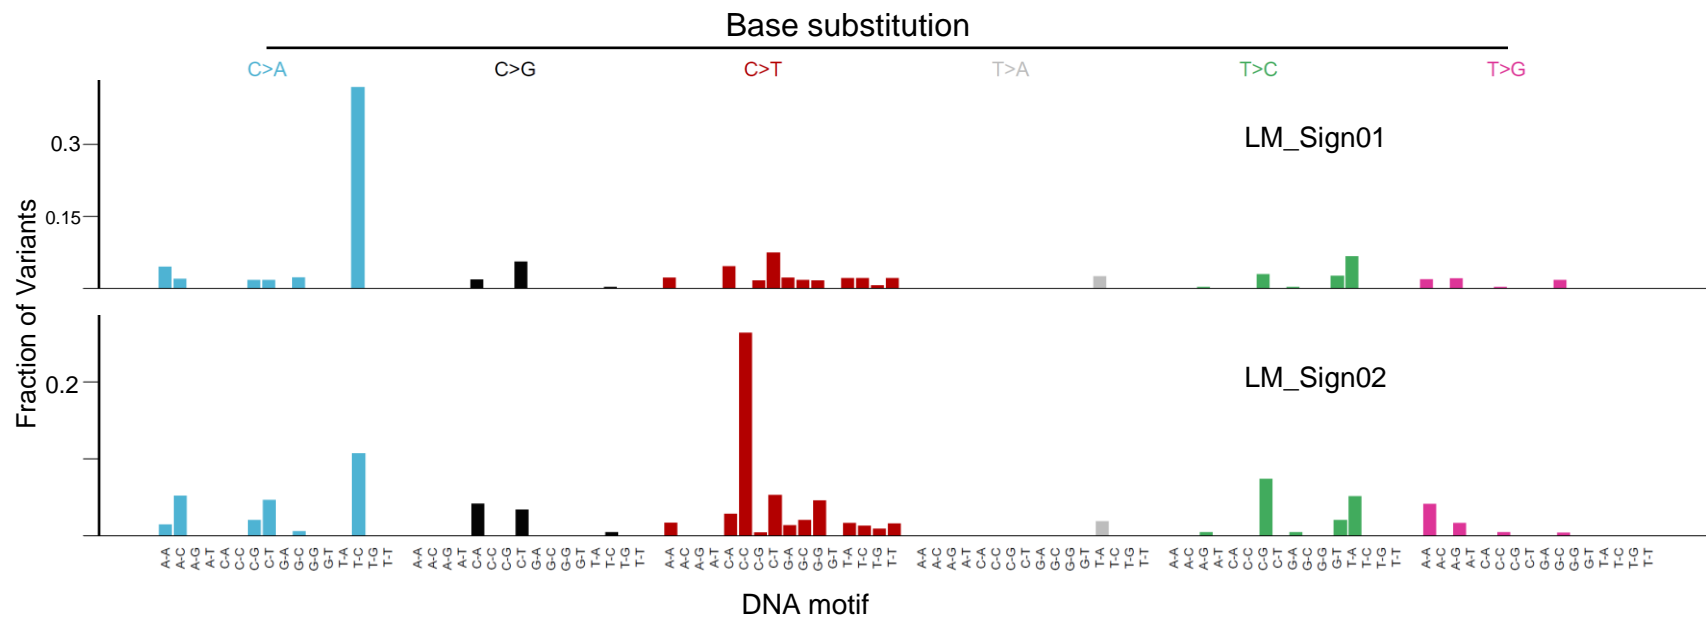**B**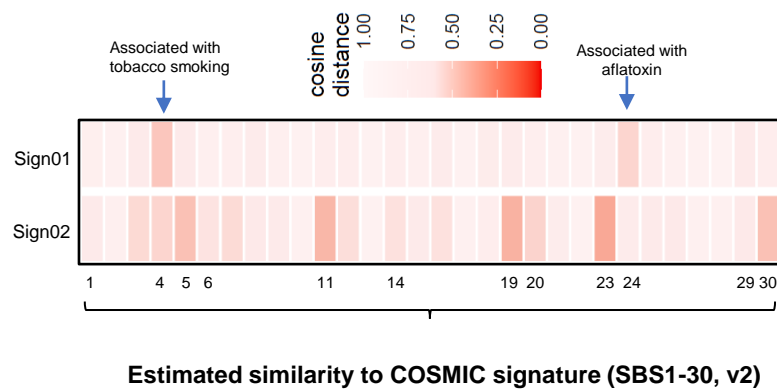**C**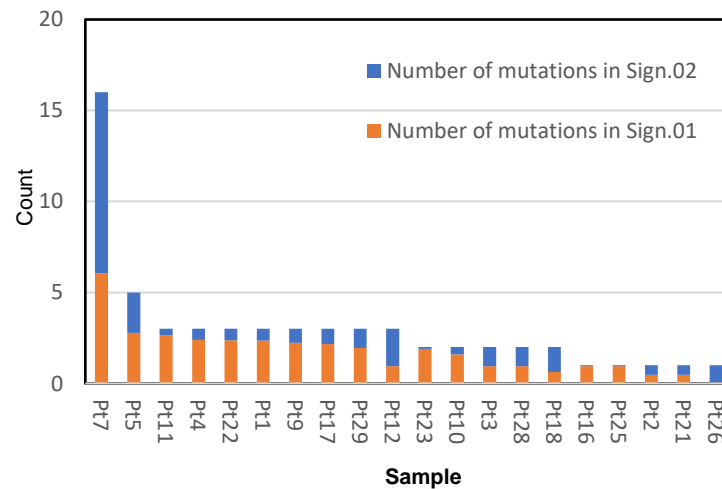

Supplement: supp [file elife-66395-supp-v1.zip › elife_poa_e66395_Figure_2_figure_supplement_2.pdf]

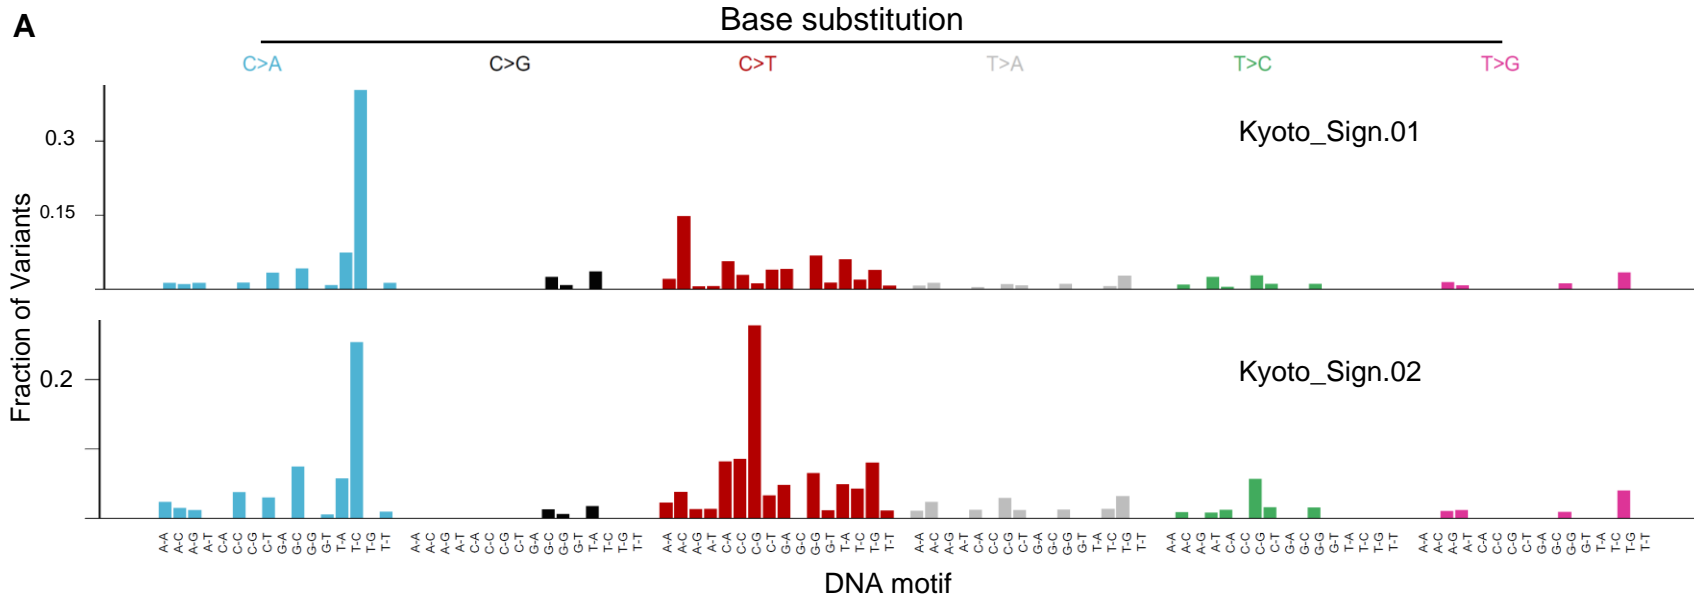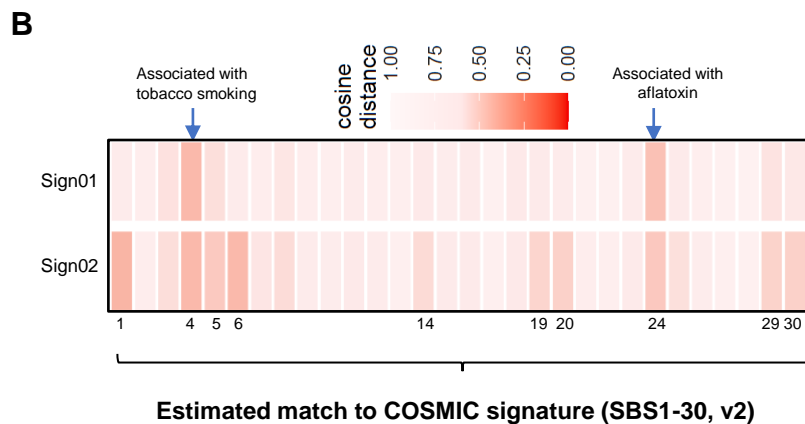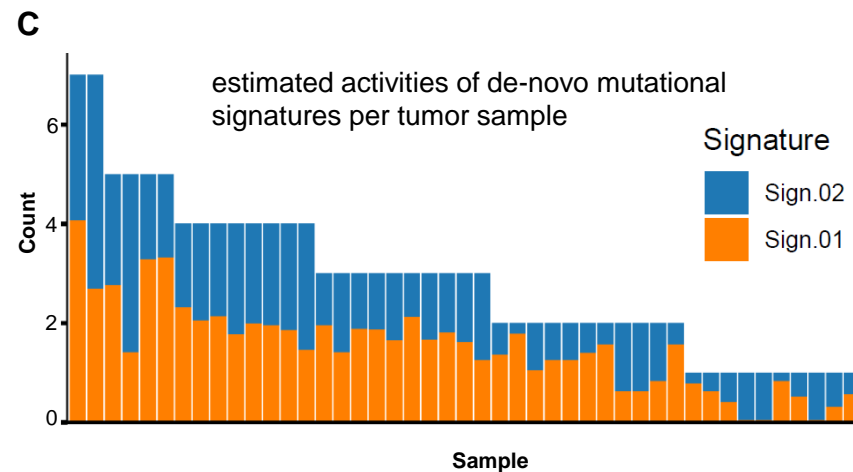

Supplement: supp [file elife-66395-supp-v1.zip › elife_poa_e66395_Figure_2_figure_supplement_3.pdf]

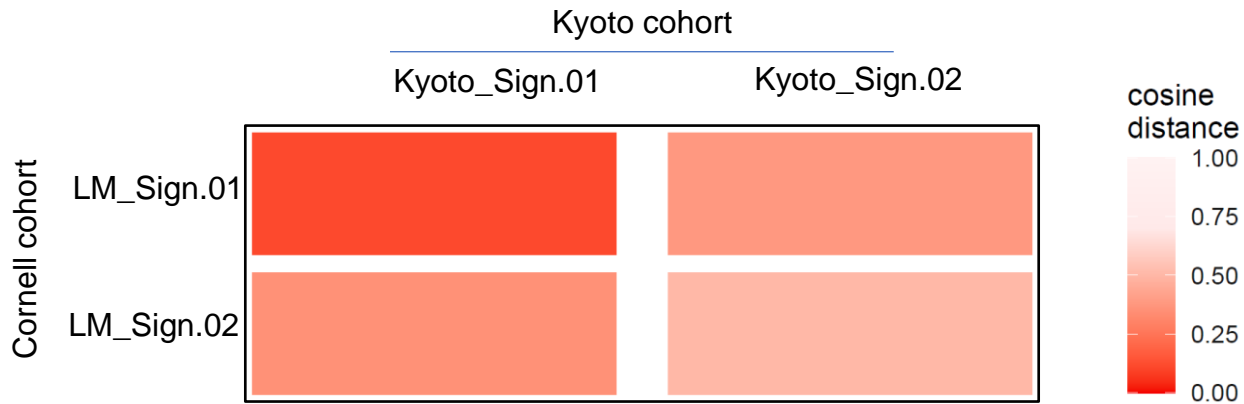

Supplement: supp [file elife-66395-supp-v1.zip › elife_poa_e66395_Figure_2_figure_supplement_4.pdf]

# AITL late mutation (Cornell cohort, non-smokers)

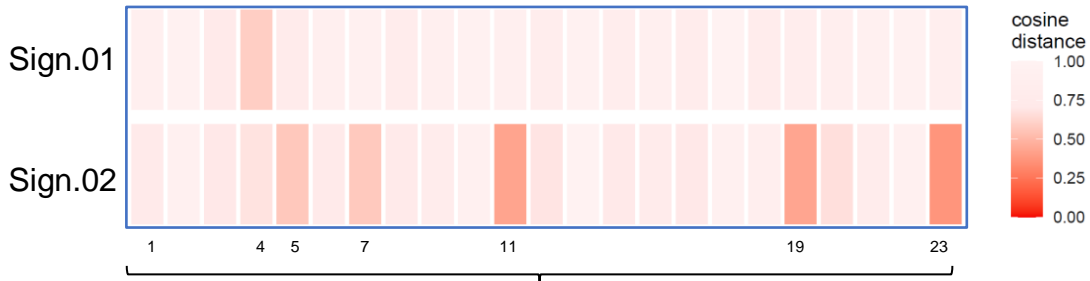

Estimated similarity to COSMIC signature (SBS1-23, v2)

Supplement: supp [file elife-66395-supp-v1.zip › elife_poa_e66395_Figure_2_figure_supplement_5.pdf]
